# Supplementary material for: Integrated Analysis of Brain Transcriptome Reveals Convergent Molecular Pathways in Autism Spectrum Disorder
Source: Front Psychiatry. 2019 Oct 8;10:706. doi: 10.3389/fpsyt.2019.00706 (PMC6795181; doi:10.3389/fpsyt.2019.00706)
Supplement: Supplementary file 1 [file Table_1.xls]

## Sheet: sheet 1
Supplementary Table 1. Differently expressed genes.
Gene_Symbol	Entrez_ID	Expression	Tissue
TRIM6-TRIM34	445372	down-regulation	CC
KRT33B	3884	down-regulation	CC
ALKAL1	389658	down-regulation	CC
CRYAA2	102724652	down-regulation	CC
CCKBR	887	down-regulation	CC
ZNF625-ZNF20	100529855	down-regulation	CC
ORAI2	80228	down-regulation	CC
CLEC17A	388512	down-regulation	CC
NPPA	4878	down-regulation	CC
SCN3B	55800	down-regulation	CC
ZNF664	144348	down-regulation	CC
FGF22	27006	down-regulation	CC
GPR19	2842	down-regulation	CC
ASCL5	647219	down-regulation	CC
ZC3H11A	9877	down-regulation	CC
ZNF841	284371	down-regulation	CC
AHRR	57491	down-regulation	CC
RESP18	389075	down-regulation	CC
KSR2	283455	down-regulation	CC
PRR36	80164	down-regulation	CC
GDA	9615	down-regulation	CC
GNG2	54331	down-regulation	CC
PTGER3	5733	down-regulation	CC
XIAP	331	down-regulation	CC
GABRQ	55879	down-regulation	CC
DLX1	1745	down-regulation	CC
SERHL2	253190	down-regulation	CC
ADCYAP1R1	117	down-regulation	CC
KRT86	3892	down-regulation	CC
XRCC3	7517	down-regulation	CC
YOD1	55432	down-regulation	CC
PPARA	5465	down-regulation	CC
EMG1	10436	down-regulation	CC
MFSD14A	64645	down-regulation	CC
AATF	26574	down-regulation	CC
SPESP1	246777	down-regulation	CC
FAM131B	9715	down-regulation	CC
CRYZ	1429	down-regulation	CC
BOLA1	51027	down-regulation	CC
ESCO2	157570	down-regulation	CC
ZNF439	90594	down-regulation	CC
CPA2	1358	down-regulation	CC
PTGER4	5734	down-regulation	CC
ZNF133	7692	down-regulation	CC
FBLN2	2199	down-regulation	CC
SLC35A3	23443	down-regulation	CC
KLF16	83855	down-regulation	CC
PLCH2	9651	down-regulation	CC
DNPH1	10591	down-regulation	CC
STAB1	23166	down-regulation	CC
CHURC1	91612	down-regulation	CC
ZNF514	84874	down-regulation	CC
CHURC1-FNTB	100529261	down-regulation	CC
TAS2R39	259285	down-regulation	CC
PBOV1	59351	down-regulation	CC
SSTR1	6751	down-regulation	CC
HESX1	8820	down-regulation	CC
COL10A1	1300	down-regulation	CC
PDPR	55066	down-regulation	CC
LRRC63	220416	down-regulation	CC
PRRG1	5638	down-regulation	CC
TMEM260	54916	down-regulation	CC
B3GNT4	79369	down-regulation	CC
TMEM108	66000	down-regulation	CC
ZCCHC10	54819	down-regulation	CC
CXADR	1525	down-regulation	CC
HYAL3	8372	down-regulation	CC
PWP2	5822	down-regulation	CC
LGALSL	29094	down-regulation	CC
CAAP1	79886	down-regulation	CC
CS	1431	down-regulation	CC
TBL1XR1	79718	down-regulation	CC
FBXO7	25793	down-regulation	CC
UVSSA	57654	down-regulation	CC
SCML1	6322	down-regulation	CC
CCDC73	493860	down-regulation	CC
ZNF550	162972	down-regulation	CC
AGO3	192669	down-regulation	CC
MMS22L	253714	down-regulation	CC
CBX3	11335	down-regulation	CC
NUDT16L1	84309	down-regulation	CC
ZNF785	146540	down-regulation	CC
TRAPPC6B	122553	down-regulation	CC
MPV17L	255027	down-regulation	CC
NCOA7	135112	down-regulation	CC
SNAPC1	6617	down-regulation	CC
PRDM2	7799	down-regulation	CC
ZNF706	51123	down-regulation	CC
CLEC2D	29121	down-regulation	CC
ZNF720	124411	down-regulation	CC
CASP2	835	down-regulation	CC
SLC13A3	64849	down-regulation	CC
PIGQ	9091	down-regulation	CC
KATNBL1	79768	down-regulation	CC
FRA10AC1	118924	down-regulation	CC
RMI1	80010	down-regulation	CC
KANTR	102723508	down-regulation	CC
ZNF555	148254	down-regulation	CC
SLC25A40	55972	down-regulation	CC
METAP1	23173	down-regulation	CC
PLSCR3	57048	down-regulation	CC
SRSF9	8683	down-regulation	CC
HNRNPD	3184	down-regulation	CC
ZNF493	284443	down-regulation	CC
TAB3	257397	down-regulation	CC
TCP11L1	55346	down-regulation	CC
CDC42SE1	56882	down-regulation	CC
TXNRD2	10587	down-regulation	CC
DTNB	1838	down-regulation	CC
INSIG2	51141	down-regulation	CC
EEFSEC	60678	down-regulation	CC
NUS1	116150	down-regulation	CC
SOS1	6654	down-regulation	CC
SRPRB	58477	down-regulation	CC
INTS3	65123	down-regulation	CC
MAP2K5	5607	down-regulation	CC
PIGG	54872	down-regulation	CC
ZSCAN32	54925	down-regulation	CC
ZNF382	84911	down-regulation	CC
PIAS2	9063	down-regulation	CC
SESTD1	91404	down-regulation	CC
SPIN4	139886	down-regulation	CC
ZNF780B	163131	down-regulation	CC
TTC3	7267	down-regulation	CC
ELAVL1	1994	down-regulation	CC
IFT27	11020	down-regulation	CC
POLR3D	661	up-regulation	CC
FGGY	55277	up-regulation	CC
LPCAT3	10162	up-regulation	CC
ECH1	1891	up-regulation	CC
PSMD9	5715	up-regulation	CC
CREB3	10488	up-regulation	CC
RPL4	6124	up-regulation	CC
RRS1	23212	up-regulation	CC
TSR2	90121	up-regulation	CC
MOB2	81532	up-regulation	CC
ZNF653	115950	up-regulation	CC
ZNF143	7702	up-regulation	CC
NAP1L1	4673	up-regulation	CC
RPS5	6193	up-regulation	CC
EXD2	55218	up-regulation	CC
NFE2L1	4779	up-regulation	CC
MED9	55090	up-regulation	CC
RPL10A	4736	up-regulation	CC
CCDC7	79741	up-regulation	CC
GRB2	2885	up-regulation	CC
PFDN5	5204	up-regulation	CC
ZNF768	79724	up-regulation	CC
RPS4X	6191	up-regulation	CC
CDYL	9425	up-regulation	CC
MEPCE	56257	up-regulation	CC
ZNF622	90441	up-regulation	CC
UCP2	7351	up-regulation	CC
RPL36AL	6166	up-regulation	CC
MANBAL	63905	up-regulation	CC
SPIN2B	474343	up-regulation	CC
RCC1	1104	up-regulation	CC
NACA	4666	up-regulation	CC
UBA52	7311	up-regulation	CC
EPOR	2057	up-regulation	CC
BORCS6	54785	up-regulation	CC
RPS6	6194	up-regulation	CC
ZNF419	79744	up-regulation	CC
SGF29	112869	up-regulation	CC
METRN	79006	up-regulation	CC
RPS23	6228	up-regulation	CC
RPL32	6161	up-regulation	CC
ADPRHL1	113622	up-regulation	CC
FBXW4	6468	up-regulation	CC
ECI1	1632	up-regulation	CC
CBX2	84733	up-regulation	CC
SSR2	6746	up-regulation	CC
RPS15	6209	up-regulation	CC
RPL23A	6147	up-regulation	CC
RPS20	6224	up-regulation	CC
RPS27A	6233	up-regulation	CC
RPL37A	6168	up-regulation	CC
EEF1A1	1915	up-regulation	CC
RPL7	6129	up-regulation	CC
GPR107	57720	up-regulation	CC
RPS16	6217	up-regulation	CC
HIPK1	204851	up-regulation	CC
MACROD1	28992	up-regulation	CC
ZNF517	340385	up-regulation	CC
CCNQ	92002	up-regulation	CC
SH3PXD2B	285590	up-regulation	CC
AKAP3	10566	up-regulation	CC
RPL17	6139	up-regulation	CC
ABHD1	84696	up-regulation	CC
H2AFJ	55766	up-regulation	CC
VAMP1	6843	up-regulation	CC
TGFB3	7043	up-regulation	CC
RPLP2	6181	up-regulation	CC
MAP1LC3B2	643246	up-regulation	CC
CRAMP1	57585	up-regulation	CC
RPL21	6144	up-regulation	CC
TSC22D3	1831	up-regulation	CC
NEB	4703	up-regulation	CC
CERS1	10715	up-regulation	CC
NR1I3	9970	up-regulation	CC
OPN1SW	611	up-regulation	CC
LAPTM4B	55353	up-regulation	CC
ROMO1	140823	up-regulation	CC
RPL36A	6173	up-regulation	CC
MID1IP1	58526	up-regulation	CC
RWDD2B	10069	up-regulation	CC
RPL41	6171	up-regulation	CC
JDP2	122953	up-regulation	CC
UBQLN3	50613	up-regulation	CC
MRM1	79922	up-regulation	CC
IBA57	200205	up-regulation	CC
CHST14	113189	up-regulation	CC
CHRNG	1146	up-regulation	CC
SAP30	8819	up-regulation	CC
YIPF7	285525	up-regulation	CC
RAB41	347517	up-regulation	CC
DEPDC1B	55789	up-regulation	CC
ATOH8	84913	up-regulation	CC
A2ML1	144568	up-regulation	CC
CLP1	10978	up-regulation	CC
PCDHGA12	26025	up-regulation	CC
PTH1R	5745	up-regulation	CC
RAD50	10111	up-regulation	CC
FCGBP	8857	up-regulation	CC
PYM1	84305	up-regulation	CC
TEF	7008	up-regulation	CC
BTBD6	90135	up-regulation	CC
BTN1A1	696	up-regulation	CC
NAPRT	93100	up-regulation	CC
CCDC168	643677	up-regulation	CC
TIGD3	220359	up-regulation	CC
RBP3	5949	up-regulation	CC
CNTD1	124817	up-regulation	CC
SPAAR	158376	up-regulation	CC
CENPX	201254	up-regulation	CC
PCDHGA3	56112	up-regulation	CC
KLHL31	401265	up-regulation	CC
NUDT8	254552	up-regulation	CC
GPRC5D	55507	up-regulation	CC
DNAH8	1769	up-regulation	CC
TEDDM1	127670	up-regulation	CC
PLIN1	5346	up-regulation	CC
ZBED1	9189	up-regulation	CC
ADRA2B	151	up-regulation	CC
PKD1L3	342372	up-regulation	CC
NR1I2	8856	up-regulation	CC
LPL	4023	up-regulation	CC
RHBDL3	162494	up-regulation	CC
OR3A2	4995	up-regulation	CC
ANGPTL6	83854	up-regulation	CC
PRRG2	5639	up-regulation	CC
HIST1H2BB	3018	up-regulation	CC
NTN5	126147	up-regulation	CC
SLC10A1	6554	up-regulation	CC
TINAGL1	64129	up-regulation	CC
TUBB1	81027	up-regulation	CC
TM4SF19	116211	up-regulation	CC
NME1-NME2	654364	up-regulation	CC
CASTOR1	652968	up-regulation	CC
CD80	941	up-regulation	CC
EPX	8288	up-regulation	CC
HHLA2	11148	up-regulation	CC
ARMC12	221481	up-regulation	CC
SERPINC1	462	up-regulation	CC
SKA3	221150	up-regulation	CC
RGCC	28984	up-regulation	CC
GNLY	10578	up-regulation	CC
FGR	2268	up-regulation	CC
MMP19	4327	up-regulation	CC
GOLGA8S	653061	up-regulation	CC
C10orf142	100130539	up-regulation	CC
METTL7A	25840	up-regulation	CC
MOCOS	55034	up-regulation	CC
KIF19	124602	up-regulation	CC
TKTL2	84076	up-regulation	CC
CD274	29126	up-regulation	CC
C17orf53	78995	up-regulation	CC
HYAL2	8692	up-regulation	CC
RHOH	399	up-regulation	CC
TDRD10	126668	up-regulation	CC
FLG2	388698	up-regulation	CC
TAS1R1	80835	up-regulation	CC
AQP1	358	up-regulation	CC
KLHDC8A	55220	up-regulation	CC
FAM237B	107986818	up-regulation	CC
BNC1	646	up-regulation	CC
ANKRD20A8P	729171	up-regulation	CC
GTSF1	121355	up-regulation	CC
MUSTN1	389125	up-regulation	CC
POU6F2	11281	up-regulation	CC
SIGLEC9	27180	up-regulation	CC
GRK7	131890	up-regulation	CC
VENTX	27287	up-regulation	CC
SH2D6	284948	up-regulation	CC
UBQLNL	143630	up-regulation	CC
NR5A2	2494	up-regulation	CC
OR1C1	26188	up-regulation	CC
QRFP	347148	up-regulation	CC
COL8A1	1295	up-regulation	CC
GRAMD2A	196996	up-regulation	CC
BSPRY	54836	up-regulation	CC
RAB40C	57799	up-regulation	CC
TXNDC5	81567	up-regulation	CC
FSCN3	29999	up-regulation	CC
GRIN3B	116444	up-regulation	CC
SLC30A8	169026	up-regulation	CC
POU2F3	25833	up-regulation	CC
STON1-GTF2A1L	286749	up-regulation	CC
CHRNA1	1134	up-regulation	CC
PXT1	222659	up-regulation	CC
CYP17A1	1586	up-regulation	CC
CNGA1	1259	up-regulation	CC
EDN1	1906	up-regulation	CC
KCNJ1	3758	up-regulation	CC
IGFBP3	3486	up-regulation	CC
C1orf116	79098	up-regulation	CC
TRAT1	50852	up-regulation	CC
TSLP	85480	up-regulation	CC
CD3G	917	up-regulation	CC
NRK	203447	up-regulation	CC
AQP5	362	up-regulation	CC
G0S2	50486	up-regulation	CC
ZP1	22917	up-regulation	CC
ZACN	353174	up-regulation	CC
SH2D2A	9047	up-regulation	CC
NAALADL1	10004	up-regulation	CC
SIGLEC5	8778	up-regulation	CC
XIRP1	165904	up-regulation	CC
VNN2	8875	up-regulation	CC
MGAM2	93432	up-regulation	CC
ADAM29	11086	up-regulation	CC
ZNF580	51157	up-regulation	CC
LAMB4	22798	up-regulation	CC
CYP2S1	29785	up-regulation	CC
IRX5	10265	up-regulation	CC
GADL1	339896	up-regulation	CC
ATP6V0E2	155066	up-regulation	CC
PYHIN1	149628	up-regulation	CC
S100A2	6273	up-regulation	CC
LRRIQ4	344657	up-regulation	CC
SERINC2	347735	up-regulation	CC
MUC5B	727897	up-regulation	CC
ERVV-1	147664	up-regulation	CC
NLRP2	55655	up-regulation	CC
SLC17A6	57084	up-regulation	CC
TESMIN	9633	up-regulation	CC
SH3RF2	153769	up-regulation	CC
KRTAP5-9	3846	up-regulation	CC
SLC6A5	9152	up-regulation	CC
SMIM35	100526771	up-regulation	CC
FAM228A	653140	up-regulation	CC
FOXN4	121643	up-regulation	CC
ONECUT2	9480	up-regulation	CC
INSM2	84684	up-regulation	CC
BCL2A1	597	up-regulation	CC
OR2M4	26245	up-regulation	CC
LRRC10B	390205	up-regulation	CC
MYPN	84665	up-regulation	CC
TUBB3	10381	up-regulation	CC
TYR	7299	up-regulation	CC
CER1	9350	up-regulation	CC
TMOD4	29765	up-regulation	CC
PLCXD1	55344	up-regulation	CC
TXNDC2	84203	up-regulation	CC
UBASH3A	53347	up-regulation	CC
RXFP4	339403	up-regulation	CC
SP5	389058	up-regulation	CC
FNDC1	84624	up-regulation	CC
OR4F21	441308	up-regulation	CC
KDM4F	100129053	up-regulation	CC
IL2RB	3560	up-regulation	CC
TKTL1	8277	up-regulation	CC
OPTC	26254	up-regulation	CC
LCT	3938	up-regulation	CC
SIGLEC14	100049587	up-regulation	CC
TMEM110-MUSTN1	100526772	up-regulation	CC
MME	4311	up-regulation	CC
NAT2	10	up-regulation	CC
XKR5	389610	up-regulation	CC
HSH2D	84941	up-regulation	CC
LAX1	54900	up-regulation	CC
OR52A1	23538	up-regulation	CC
NACA2	342538	up-regulation	CC
TOPAZ1	375337	up-regulation	CC
CALCB	797	up-regulation	CC
FBXO39	162517	up-regulation	CC
OR52E2	119678	up-regulation	CC
TEN1	100134934	up-regulation	CC
HBA1	3039	up-regulation	CC
OR5AS1	219447	up-regulation	CC
SLC18A1	6570	up-regulation	CC
OR11H4	390442	up-regulation	CC
RGS13	6003	up-regulation	CC
TAS2R38	5726	up-regulation	CC
GPR6	2830	up-regulation	CC
VDR	7421	up-regulation	CC
SPAM1	6677	up-regulation	CC
CXCL1	2919	up-regulation	CC
SDR42E1	93517	up-regulation	CC
OR2T12	127064	up-regulation	CC
OIT3	170392	up-regulation	CC
TMPRSS4	56649	up-regulation	CC
CLCA1	1179	up-regulation	CC
GTF2H4	2968	up-regulation	CC
NPBWR2	2832	up-regulation	CC
TUBAL3	79861	up-regulation	CC
PRPS1L1	221823	up-regulation	CC
ATP12A	479	up-regulation	CC
CYP7A1	1581	up-regulation	CC
ABCB5	340273	up-regulation	CC
PLA2G4D	283748	up-regulation	CC
CTCFL	140690	up-regulation	CC
OR2M3	127062	up-regulation	CC
USP29	57663	up-regulation	CC
HYAL4	23553	up-regulation	CC
CHAT	1103	up-regulation	CC
XDH	7498	up-regulation	CC
OR5H6	79295	up-regulation	CC
XIRP2	129446	up-regulation	CC
MUC17	140453	up-regulation	CC
TBXA2R	6915	up-regulation	CC
OR5M9	390162	up-regulation	CC
OR10Z1	128368	up-regulation	CC
MYH1	4619	up-regulation	CC
SMTNL2	342527	up-regulation	CC
CDHR4	389118	up-regulation	CC
IGFBP1	3484	up-regulation	CC
ADGRE1	2015	up-regulation	CC
TCHHL1	126637	up-regulation	CC
SOX14	8403	up-regulation	CC
TM4SF19-TCTEX1D2	100534611	up-regulation	CC
OR56A5	390084	up-regulation	CC
MUC16	94025	up-regulation	CC
AGTR2	186	up-regulation	CC
IGF2BP1	10642	up-regulation	CC
OR51D1	390038	up-regulation	CC
OR5H1	26341	up-regulation	CC
TGM5	9333	up-regulation	CC
ZSCAN4	201516	up-regulation	CC
CNR2	1269	up-regulation	CC
OR5AU1	390445	up-regulation	CC
CCDC27	148870	up-regulation	CC
TMPRSS15	5651	up-regulation	CC
OR7A5	26659	up-regulation	CC
RAX2	84839	up-regulation	CC
ENTHD1	150350	up-regulation	CC
LY6D	8581	up-regulation	CC
CLDN14	23562	up-regulation	CC
ITGAD	3681	up-regulation	CC
OR6N1	128372	up-regulation	CC
LRRC15	131578	up-regulation	CC
MRGPRD	116512	up-regulation	CC
TEX44	165100	up-regulation	CC
TRIM55	84675	up-regulation	CC
DSPP	1834	up-regulation	CC
GDF2	2658	up-regulation	CC
DRD3	1814	up-regulation	CC
OR10A6	390093	up-regulation	CC
EBLN1	340900	up-regulation	CC
KRT3	3850	up-regulation	CC
ZSCAN10	84891	up-regulation	CC
SKOR2	652991	up-regulation	CC
MMP3	4314	up-regulation	CC
SMIM31	100505989	up-regulation	CC
SMIM21	284274	up-regulation	CC
SLC36A3	285641	up-regulation	CC
PRSS56	646960	up-regulation	CC
DEFA1	1667	up-regulation	CC
HRG	3273	up-regulation	CC
SPATA31D1	389763	up-regulation	CC
VSX2	338917	up-regulation	CC
AADACL3	126767	up-regulation	CC
CRISP3	10321	up-regulation	CC
KLF14	136259	up-regulation	CC
MATN4	8785	up-regulation	CC
ACSM2B	348158	up-regulation	CC
OR9G4	283189	up-regulation	CC
PGK2	5232	up-regulation	CC
KRT2	3849	up-regulation	CC
OR4F15	390649	up-regulation	CC
BPIFA3	128861	up-regulation	CC
CCDC185	164127	up-regulation	CC
IL36B	27177	up-regulation	CC
TLX2	3196	up-regulation	CC
KCNA10	3744	up-regulation	CC
INSL5	10022	up-regulation	CC
IFITM5	387733	up-regulation	CC
KRTAP19-8	728299	up-regulation	CC
SCP2D1	140856	up-regulation	CC
FGA	2243	up-regulation	CC
TRIM77	390231	up-regulation	CC
ADH7	131	up-regulation	CC
GPR101	83550	up-regulation	CC
C9	735	up-regulation	CC
OR52M1	119772	up-regulation	CC
TMEM174	134288	up-regulation	CC
KRTAP5-6	440023	up-regulation	CC
VN1R4	317703	up-regulation	CC
FAM83B	222584	up-regulation	CC
OR8B3	390271	up-regulation	CC
NLRP5	126206	up-regulation	CC
MS4A2	2206	up-regulation	CC
ACTRT2	140625	up-regulation	CC
C3orf85	401081	up-regulation	CC
LCN10	414332	up-regulation	CC
OR11H2	79334	up-regulation	CC
DAZL	1618	up-regulation	CC
LIPN	643418	up-regulation	CC
OR4C3	256144	up-regulation	CC
VGLL2	245806	up-regulation	CC
ADGRG7	84873	up-regulation	CC
GSDMA	284110	up-regulation	CC
CCDC155	147872	up-regulation	CC
TMEM239	100288797	up-regulation	CC
GCG	2641	up-regulation	CC
TAS2R60	338398	up-regulation	CC
GCM1	8521	up-regulation	CC
PSKH2	85481	up-regulation	CC
UGT1A1	54658	up-regulation	CC
PRR9	574414	up-regulation	CC
CASP14	23581	up-regulation	CC
OR5F1	338674	up-regulation	CC
AHSP	51327	up-regulation	CC
KRTAP12-3	386683	up-regulation	CC
KLRG2	346689	up-regulation	CC
UGT1A6	54578	up-regulation	CC
GJA3	2700	up-regulation	CC
LRRC72	100506049	up-regulation	CC
CSH1	1442	up-regulation	CC
SCGB1C1	147199	up-regulation	CC
GH1	2688	up-regulation	CC
CST9L	128821	up-regulation	CC
OR2T34	127068	up-regulation	CC
CNGA2	1260	up-regulation	CC
TM4SF4	7104	up-regulation	CC
OR6Q1	219952	up-regulation	CC
AGXT	189	up-regulation	CC
KRTAP13-2	337959	up-regulation	CC
OR5K3	403277	up-regulation	CC
CEACAM16	388551	up-regulation	CC
HOXA4	3201	up-regulation	CC
CIDEC	63924	up-regulation	CC
OR51F2	119694	up-regulation	CC
OR2M2	391194	up-regulation	CC
OR10J3	441911	up-regulation	CC
NKX2-5	1482	up-regulation	CC
DEFB127	140850	up-regulation	CC
OR2M7	391196	up-regulation	CC
MMP13	4322	up-regulation	CC
ANKRD33	341405	up-regulation	CC
GBX1	2636	up-regulation	CC
AFM	173	up-regulation	CC
SYNGR4	23546	up-regulation	CC
HOXB6	3216	up-regulation	CC
GPHB5	122876	up-regulation	CC
SAGE1	55511	up-regulation	CC
PASD1	139135	up-regulation	CC
SIGLEC6	946	up-regulation	CC
CXCL13	10563	up-regulation	CC
HOXB13	10481	up-regulation	CC
CSN3	1448	up-regulation	CC
SCGB2A1	4246	up-regulation	CC
OR5D16	390144	up-regulation	CC
MOGAT3	346606	up-regulation	CC
MMP10	4319	up-regulation	CC
IL20	50604	up-regulation	CC
TRIM49	57093	up-regulation	CC
IL17F	112744	up-regulation	CC
HNF1B	6928	up-regulation	CC
HOXD13	3239	up-regulation	CC
KRTAP19-3	337970	up-regulation	CC
UBTFL1	642623	up-regulation	CC
ALPG	251	up-regulation	CC
DCAF8L1	139425	up-regulation	CC
HOXA11	3207	up-regulation	CC
UGT1A10	54575	up-regulation	CC
HTR3D	200909	up-regulation	CC
SERPINA4	5267	up-regulation	CC
MAGEB1	4112	up-regulation	CC
MS4A15	219995	up-regulation	CC
UGT2B4	7363	up-regulation	CC
SLC35G3	146861	up-regulation	CC
BPIFB1	92747	up-regulation	CC
OR6C70	390327	up-regulation	CC
DKK4	27121	up-regulation	CC
FOXI2	399823	up-regulation	CC
HOXA2	3199	up-regulation	CC
UMOD	7369	up-regulation	CC
ALPP	250	up-regulation	CC
C1orf68	100129271	up-regulation	CC
ADAD1	132612	up-regulation	CC
OR4B1	119765	up-regulation	CC
OR6C76	390326	up-regulation	CC
PRR23C	389152	up-regulation	CC
REG3A	5068	up-regulation	CC
GTSF1L	149699	up-regulation	CC
PRDM13	59336	up-regulation	CC
CFHR5	81494	up-regulation	CC
ART5	116969	up-regulation	CC
PRAMEF14	729528	up-regulation	CC
OR6K2	81448	up-regulation	CC
TGIF2LX	90316	up-regulation	CC
TNNT3	7140	up-regulation	CC
KRT14	3861	up-regulation	CC
DMRTC2	63946	up-regulation	CC
CCL24	6369	up-regulation	CC
CDH16	1014	up-regulation	CC
KRT72	140807	up-regulation	CC
RDH8	50700	up-regulation	CC
KRTAP4-4	84616	up-regulation	CC
GALR2	8811	up-regulation	CC
LALBA	3906	up-regulation	CC
MS4A10	341116	up-regulation	CC
PRSS21	10942	up-regulation	CC
PRG2	5553	up-regulation	CC
KPRP	448834	up-regulation	CC
ORM1	5004	up-regulation	CC
NYX	60506	up-regulation	CC
TRIM43	129868	up-regulation	CC
OTOP1	133060	up-regulation	CC
HAND1	9421	up-regulation	CC
MAGEB6B	392433	up-regulation	CC
CD1A	909	up-regulation	CC
CABS1	85438	up-regulation	CC
ANHX	647589	up-regulation	CC
C8A	731	up-regulation	CC
GPR50	9248	up-regulation	CC
UGT1A7	54577	up-regulation	CC
FAM71B	153745	up-regulation	CC
CPN1	1369	up-regulation	CC
LRIT1	26103	up-regulation	CC
OR10H4	126541	up-regulation	CC
ADIPOQ	9370	up-regulation	CC
GIMD1	100507096	up-regulation	CC
MAGEB16	139604	up-regulation	CC
PAX4	5078	up-regulation	CC
SPATA31D4	389761	up-regulation	CC
ACTL8	81569	up-regulation	CC
CATSPER1	117144	up-regulation	CC
CEACAM3	1084	up-regulation	CC
TAS1R2	80834	up-regulation	CC
KRT84	3890	up-regulation	CC
DWORF	100507537	up-regulation	CC
DEFA1B	728358	up-regulation	CC
CCDC140	151278	up-regulation	CC
ITIH6	347365	up-regulation	CC
DPEP1	1800	up-regulation	CC
CYP4F8	11283	up-regulation	CC
TRIM42	287015	up-regulation	CC
DEFA3	1668	up-regulation	CC
C10orf71	118461	up-regulation	CC
OR52L1	338751	up-regulation	CC
KRT75	9119	up-regulation	CC
INO80B-WBP1	100532735	down-regulation	PFC
GIMAP1-GIMAP5	100527949	down-regulation	PFC
MUC13	56667	down-regulation	PFC
LAD1	3898	down-regulation	PFC
HSPA6	3310	down-regulation	PFC
TREML4	285852	down-regulation	PFC
RNF223	401934	down-regulation	PFC
CALHM3	119395	down-regulation	PFC
CXCR5	643	down-regulation	PFC
CSF3	1440	down-regulation	PFC
PINX1	54984	down-regulation	PFC
SLAMF1	6504	down-regulation	PFC
DUOXA2	405753	down-regulation	PFC
GOLGA6L1	283767	down-regulation	PFC
APOA2	336	down-regulation	PFC
SOAT2	8435	down-regulation	PFC
SLC28A1	9154	down-regulation	PFC
MISP	126353	down-regulation	PFC
LIF	3976	down-regulation	PFC
POTEC	388468	down-regulation	PFC
DPEP2NB	100131303	down-regulation	PFC
PLAC1	10761	down-regulation	PFC
GAL3ST2	64090	down-regulation	PFC
OSM	5008	down-regulation	PFC
RPL10L	140801	down-regulation	PFC
OR8G1	26494	down-regulation	PFC
SIGLEC12	89858	down-regulation	PFC
MAJIN	283129	down-regulation	PFC
IL1B	3553	down-regulation	PFC
FASLG	356	down-regulation	PFC
OR1A2	26189	down-regulation	PFC
IL6	3569	down-regulation	PFC
KRT6B	3854	down-regulation	PFC
ICOS	29851	down-regulation	PFC
TMEM256-PLSCR3	100529211	down-regulation	PFC
CCDC42	146849	down-regulation	PFC
CCL3	6348	down-regulation	PFC
SELE	6401	down-regulation	PFC
CXCL8	3576	down-regulation	PFC
SSTR5	6755	down-regulation	PFC
CXCL10	3627	down-regulation	PFC
SOCS3	9021	down-regulation	PFC
FKBP6	8468	down-regulation	PFC
ANKRD33	341405	down-regulation	PFC
TNFRSF12A	51330	down-regulation	PFC
SPATA32	124783	down-regulation	PFC
ADGRD2	347088	down-regulation	PFC
SERPINE1	5054	down-regulation	PFC
RGS1	5996	down-regulation	PFC
GDF15	9518	down-regulation	PFC
CLDN19	149461	down-regulation	PFC
SERPINH1	871	down-regulation	PFC
HSPA1A	3303	down-regulation	PFC
HSH2D	84941	down-regulation	PFC
DCST1	149095	down-regulation	PFC
CRB3	92359	down-regulation	PFC
CCDC83	220047	down-regulation	PFC
RNF17	56163	down-regulation	PFC
C10orf53	282966	down-regulation	PFC
TTC24	164118	down-regulation	PFC
MSGN1	343930	down-regulation	PFC
PEAK3	374872	down-regulation	PFC
CCL8	6355	down-regulation	PFC
MMP9	4318	down-regulation	PFC
HIST2H3PS2	440686	down-regulation	PFC
MSMP	692094	down-regulation	PFC
KCNE1B	102723475	down-regulation	PFC
MCM10	55388	down-regulation	PFC
CCL2	6347	down-regulation	PFC
HSPA1B	3304	down-regulation	PFC
CCL4	6351	down-regulation	PFC
ZC3H12A	80149	down-regulation	PFC
TEN1	100134934	down-regulation	PFC
MICB	4277	down-regulation	PFC
ASCL2	430	down-regulation	PFC
FOSB	2354	down-regulation	PFC
C1orf116	79098	down-regulation	PFC
USP41	373856	down-regulation	PFC
LRG1	116844	down-regulation	PFC
DNAJB1	3337	down-regulation	PFC
ATF3	467	down-regulation	PFC
C11orf91	100131378	down-regulation	PFC
RRAD	6236	down-regulation	PFC
LILRB2	10288	down-regulation	PFC
FAM209B	388799	down-regulation	PFC
CD80	941	down-regulation	PFC
CDKN1A	1026	down-regulation	PFC
LTF	4057	down-regulation	PFC
FOS	2353	down-regulation	PFC
WDR64	128025	down-regulation	PFC
APOLD1	81575	down-regulation	PFC
NPBWR2	2832	down-regulation	PFC
FAM83F	113828	down-regulation	PFC
THEG	51298	down-regulation	PFC
SCRT2	85508	down-regulation	PFC
F2RL3	9002	down-regulation	PFC
GADD45B	4616	down-regulation	PFC
NPAS4	266743	down-regulation	PFC
MYO1A	4640	down-regulation	PFC
HEMGN	55363	down-regulation	PFC
CFAP97D1	284067	down-regulation	PFC
SPOCD1	90853	down-regulation	PFC
ANKRD30A	91074	down-regulation	PFC
TNFAIP3	7128	down-regulation	PFC
LAMC2	3918	down-regulation	PFC
GP5	2814	down-regulation	PFC
ESPL1	9700	down-regulation	PFC
PRTN3	5657	down-regulation	PFC
CTLA4	1493	down-regulation	PFC
WDR74	54663	down-regulation	PFC
TOMM6	100188893	down-regulation	PFC
FSCN3	29999	down-regulation	PFC
PRAP1	118471	down-regulation	PFC
NUDT16L1	84309	down-regulation	PFC
TMEM88B	643965	down-regulation	PFC
ZFP36	7538	down-regulation	PFC
TMOD4	29765	down-regulation	PFC
CCIN	881	down-regulation	PFC
ACTN3	89	down-regulation	PFC
HSPE1-MOB4	100529241	down-regulation	PFC
CD300LG	146894	down-regulation	PFC
CXCL2	2920	down-regulation	PFC
UMODL1	89766	down-regulation	PFC
CD69	969	down-regulation	PFC
BHLHA15	168620	down-regulation	PFC
SGO1	151648	down-regulation	PFC
LINGO3	645191	down-regulation	PFC
TGM3	7053	down-regulation	PFC
CDKN2AIP	55602	down-regulation	PFC
AIF1L	83543	down-regulation	PFC
ETDB	100129515	down-regulation	PFC
TBC1D28	254272	down-regulation	PFC
C5AR1	728	down-regulation	PFC
TM4SF1	4071	down-regulation	PFC
NKRF	55922	down-regulation	PFC
CH25H	9023	down-regulation	PFC
FXYD6-FXYD2	100533181	down-regulation	PFC
LILRA6	79168	down-regulation	PFC
G0S2	50486	down-regulation	PFC
EVPL	2125	down-regulation	PFC
ADM	133	down-regulation	PFC
KLHL6	89857	down-regulation	PFC
FOXE1	2304	down-regulation	PFC
PPP1R15A	23645	down-regulation	PFC
NPSR1	387129	down-regulation	PFC
CLEC17A	388512	down-regulation	PFC
CDC20	991	down-regulation	PFC
PCP2	126006	down-regulation	PFC
CYP24A1	1591	down-regulation	PFC
DNAJC22	79962	down-regulation	PFC
PLVAP	83483	down-regulation	PFC
THBD	7056	down-regulation	PFC
AKAP14	158798	down-regulation	PFC
JUNB	3726	down-regulation	PFC
PCDHGA1	56114	down-regulation	PFC
NXPH4	11247	down-regulation	PFC
ADAMTS1	9510	down-regulation	PFC
RIBC1	158787	down-regulation	PFC
IL7R	3575	down-regulation	PFC
E2F7	144455	down-regulation	PFC
RNF122	79845	down-regulation	PFC
BAG3	9531	down-regulation	PFC
PARP15	165631	down-regulation	PFC
MAFF	23764	down-regulation	PFC
CKAP2L	150468	down-regulation	PFC
FPR1	2357	down-regulation	PFC
NR4A1	3164	down-regulation	PFC
GPR34	2857	down-regulation	PFC
ZNF267	10308	down-regulation	PFC
ISG20	3669	down-regulation	PFC
SNAI1	6615	down-regulation	PFC
BCL6B	255877	down-regulation	PFC
MYCN	4613	down-regulation	PFC
GPR132	29933	down-regulation	PFC
OLR1	4973	down-regulation	PFC
NR0B1	190	down-regulation	PFC
CYR61	3491	down-regulation	PFC
HBEGF	1839	down-regulation	PFC
PLAUR	5329	down-regulation	PFC
ACTA1	58	down-regulation	PFC
ACTRT3	84517	down-regulation	PFC
SERTAD1	29950	down-regulation	PFC
RELB	5971	down-regulation	PFC
HSFX3	101928917	down-regulation	PFC
GGN	199720	down-regulation	PFC
DLL4	54567	down-regulation	PFC
GJB7	375519	down-regulation	PFC
C4orf54	285556	down-regulation	PFC
DUSP27	92235	down-regulation	PFC
LDLR	3949	down-regulation	PFC
NCF1	653361	down-regulation	PFC
APCDD1L	164284	down-regulation	PFC
EGR1	1958	down-regulation	PFC
RDH12	145226	down-regulation	PFC
CASS4	57091	down-regulation	PFC
GEM	2669	down-regulation	PFC
BMP8A	353500	down-regulation	PFC
OSGIN1	29948	down-regulation	PFC
LRRIQ3	127255	down-regulation	PFC
MATN1	4146	down-regulation	PFC
FERMT3	83706	down-regulation	PFC
IER5	51278	down-regulation	PFC
EGR4	1961	down-regulation	PFC
CACNA1H	8912	down-regulation	PFC
HORMAD1	84072	down-regulation	PFC
ICAM3	3385	down-regulation	PFC
EGR2	1959	down-regulation	PFC
CAPN13	92291	down-regulation	PFC
CALML3	810	down-regulation	PFC
CEBPD	1052	down-regulation	PFC
DUSP5	1847	down-regulation	PFC
OXCT2	64064	down-regulation	PFC
SIK1B	102724428	down-regulation	PFC
SKAP1	8631	down-regulation	PFC
NFKB2	4791	down-regulation	PFC
NPPC	4880	down-regulation	PFC
SLC17A9	63910	down-regulation	PFC
SCAMP5	192683	down-regulation	PFC
ALPK3	57538	down-regulation	PFC
DUSP1	1843	down-regulation	PFC
SPHK1	8877	down-regulation	PFC
CRYBB1	1414	down-regulation	PFC
SPON2	10417	down-regulation	PFC
RSPH10B2	728194	down-regulation	PFC
MLKL	197259	down-regulation	PFC
HR	55806	down-regulation	PFC
NFKBIZ	64332	down-regulation	PFC
REM2	161253	down-regulation	PFC
FAM83D	81610	down-regulation	PFC
SLC16A3	9123	down-regulation	PFC
SRGN	5552	down-regulation	PFC
KNCN	148930	down-regulation	PFC
FAM222A	84915	down-regulation	PFC
BTG2	7832	down-regulation	PFC
VGF	7425	down-regulation	PFC
RAB40C	57799	down-regulation	PFC
SOCS2	8835	down-regulation	PFC
OXGR1	27199	down-regulation	PFC
IRF1	3659	down-regulation	PFC
LAPTM4B	55353	down-regulation	PFC
RTL9	57529	down-regulation	PFC
MATR3	9782	down-regulation	PFC
ERAP2	64167	down-regulation	PFC
H2BFS	54145	down-regulation	PFC
FOXD4	2298	down-regulation	PFC
NFKBID	84807	down-regulation	PFC
MST1R	4486	down-regulation	PFC
FAM180B	399888	down-regulation	PFC
KCNE1	3753	down-regulation	PFC
IL10RA	3587	down-regulation	PFC
PKMYT1	9088	down-regulation	PFC
TTYH2	94015	down-regulation	PFC
CXCR4	7852	down-regulation	PFC
RND1	27289	down-regulation	PFC
PRDM1	639	down-regulation	PFC
ZNF678	339500	down-regulation	PFC
PDE6B	5158	down-regulation	PFC
C19orf73	55150	down-regulation	PFC
GSE1	23199	down-regulation	PFC
KLF6	1316	down-regulation	PFC
SHROOM4	57477	down-regulation	PFC
SPSB1	80176	down-regulation	PFC
IGSF9B	22997	down-regulation	PFC
JUN	3725	down-regulation	PFC
AHRR	57491	down-regulation	PFC
IL11	3589	down-regulation	PFC
TTI2	80185	down-regulation	PFC
CACNA1G	8913	down-regulation	PFC
EIF5AL1	143244	down-regulation	PFC
MYBPH	4608	down-regulation	PFC
ITGAX	3687	down-regulation	PFC
KAZALD1	81621	down-regulation	PFC
PNP	4860	down-regulation	PFC
SLC35C1	55343	down-regulation	PFC
CSRNP1	64651	down-regulation	PFC
PRRT4	401399	down-regulation	PFC
VEGFA	7422	down-regulation	PFC
NUTM2D	728130	down-regulation	PFC
HIST2H3A	333932	down-regulation	PFC
NRARP	441478	down-regulation	PFC
FAM110D	79927	down-regulation	PFC
ZNF329	79673	down-regulation	PFC
MAP2K3	5606	down-regulation	PFC
KCNK3	3777	down-regulation	PFC
SMAGP	57228	down-regulation	PFC
YBX2	51087	down-regulation	PFC
RGS16	6004	down-regulation	PFC
VSIG2	23584	down-regulation	PFC
GSG1L	146395	down-regulation	PFC
MIDN	90007	down-regulation	PFC
PRAG1	157285	down-regulation	PFC
CHAC1	79094	down-regulation	PFC
YIPF6	286451	down-regulation	PFC
INF2	64423	down-regulation	PFC
PLK3	1263	down-regulation	PFC
SH3PXD2B	285590	down-regulation	PFC
CRIP1	1396	down-regulation	PFC
ARID5A	10865	down-regulation	PFC
RARA	5914	down-regulation	PFC
THBS2	7058	down-regulation	PFC
ITPRIP	85450	down-regulation	PFC
BAALC	79870	down-regulation	PFC
RIPOR3	140876	down-regulation	PFC
TRAIP	10293	down-regulation	PFC
DUSP2	1844	down-regulation	PFC
COL11A2	1302	down-regulation	PFC
PTGS2	5743	down-regulation	PFC
B4GALT1	2683	down-regulation	PFC
GPR3	2827	down-regulation	PFC
JMJD4	65094	down-regulation	PFC
NHLH2	4808	down-regulation	PFC
KLHL25	64410	down-regulation	PFC
PCDHGB3	56102	down-regulation	PFC
LOXL2	4017	down-regulation	PFC
ZNF324B	388569	down-regulation	PFC
E2F1	1869	down-regulation	PFC
SEMA4D	10507	down-regulation	PFC
HSPH1	10808	down-regulation	PFC
C9orf16	79095	down-regulation	PFC
SAPCD2	89958	down-regulation	PFC
ALOX5	240	down-regulation	PFC
CREB1	1385	down-regulation	PFC
TMEM160	54958	down-regulation	PFC
SPIN1	10927	down-regulation	PFC
MPV17L2	84769	down-regulation	PFC
SPATA2L	124044	down-regulation	PFC
MAP6D1	79929	down-regulation	PFC
HMBS	3145	down-regulation	PFC
IRAK1	3654	down-regulation	PFC
FBXL14	144699	down-regulation	PFC
IER5L	389792	down-regulation	PFC
IL18BP	10068	down-regulation	PFC
OPRL1	4987	down-regulation	PFC
CCDC17	149483	down-regulation	PFC
MFSD2A	84879	down-regulation	PFC
DNAH10	196385	down-regulation	PFC
SH2D6	284948	down-regulation	PFC
ZNF30	90075	down-regulation	PFC
SLC25A1	6576	down-regulation	PFC
RELT	84957	down-regulation	PFC
SHB	6461	down-regulation	PFC
RTN4R	65078	down-regulation	PFC
TEDC1	283643	down-regulation	PFC
GNB1L	54584	down-regulation	PFC
PAK4	10298	down-regulation	PFC
NKAIN1	79570	down-regulation	PFC
SRCIN1	80725	down-regulation	PFC
GDF6	392255	down-regulation	PFC
NPIPB2	729978	down-regulation	PFC
MYLIP	29116	down-regulation	PFC
CBARP	255057	down-regulation	PFC
HK2	3099	down-regulation	PFC
CORO7	79585	down-regulation	PFC
TSSC4	10078	down-regulation	PFC
ANKRD52	283373	down-regulation	PFC
DHCR7	1717	down-regulation	PFC
KREMEN2	79412	down-regulation	PFC
ARRDC2	27106	down-regulation	PFC
PANX2	56666	down-regulation	PFC
ZFAND2A	90637	down-regulation	PFC
SOHLH1	402381	down-regulation	PFC
CDC34	997	down-regulation	PFC
CHRM4	1132	down-regulation	PFC
SLC6A6	6533	down-regulation	PFC
RRBP1	6238	down-regulation	PFC
KCNJ14	3770	down-regulation	PFC
COX7A1	1346	down-regulation	PFC
DBNDD1	79007	down-regulation	PFC
ARSF	416	down-regulation	PFC
ZBTB7B	51043	down-regulation	PFC
C19orf24	55009	down-regulation	PFC
ZSWIM4	65249	down-regulation	PFC
ABHD12B	145447	down-regulation	PFC
CLEC11A	6320	down-regulation	PFC
DAGLA	747	down-regulation	PFC
LZTS1	11178	down-regulation	PFC
FABP3	2170	down-regulation	PFC
ABTB2	25841	down-regulation	PFC
NOCT	25819	down-regulation	PFC
SPEF1	25876	down-regulation	PFC
RASIP1	54922	down-regulation	PFC
B3GNT7	93010	down-regulation	PFC
DPYSL5	56896	down-regulation	PFC
KCNJ4	3761	down-regulation	PFC
RNF126	55658	down-regulation	PFC
NECAB3	63941	down-regulation	PFC
PPP2R3B	28227	down-regulation	PFC
POC1A	25886	down-regulation	PFC
C9orf116	138162	down-regulation	PFC
IER2	9592	down-regulation	PFC
LRRC75A	388341	down-regulation	PFC
PVR	5817	down-regulation	PFC
SYVN1	84447	down-regulation	PFC
ATP5F1D	513	down-regulation	PFC
CNIH2	254263	down-regulation	PFC
ZNF581	51545	down-regulation	PFC
SNAI3	333929	down-regulation	PFC
ARHGEF10	9639	down-regulation	PFC
FKRP	79147	down-regulation	PFC
PPP1R14B	26472	down-regulation	PFC
SLC25A25	114789	down-regulation	PFC
NECTIN1	5818	down-regulation	PFC
MGRN1	23295	down-regulation	PFC
CYB561D2	11068	down-regulation	PFC
NOL4L	140688	down-regulation	PFC
SCRT1	83482	down-regulation	PFC
DLGAP3	58512	down-regulation	PFC
KCNK4	50801	down-regulation	PFC
MRPS2	51116	down-regulation	PFC
WDR18	57418	down-regulation	PFC
CCDC134	79879	down-regulation	PFC
PPP2R3B	28227	down-regulation	PFC
ITPKC	80271	down-regulation	PFC
RELL2	285613	down-regulation	PFC
C10orf95	79946	down-regulation	PFC
CDT1	81620	down-regulation	PFC
TMEM41B	440026	down-regulation	PFC
ZNF593	51042	down-regulation	PFC
ADAMTS8	11095	down-regulation	PFC
SLC25A45	283130	down-regulation	PFC
RAC3	5881	down-regulation	PFC
PMF1	11243	down-regulation	PFC
FAM78A	286336	down-regulation	PFC
PCDHGC5	56097	down-regulation	PFC
RNPEPL1	57140	down-regulation	PFC
PRKCD	5580	down-regulation	PFC
NLGN3	54413	down-regulation	PFC
SEMA4A	64218	down-regulation	PFC
PLBD2	196463	down-regulation	PFC
DEDD2	162989	down-regulation	PFC
ZBTB7C	201501	down-regulation	PFC
LRFN4	78999	down-regulation	PFC
JMJD6	23210	down-regulation	PFC
ALDH8A1	64577	down-regulation	PFC
ZNF615	284370	down-regulation	PFC
WNT7A	7476	down-regulation	PFC
FAM3A	60343	down-regulation	PFC
BOLA2-SMG1P6	107282092	down-regulation	PFC
CPLX1	10815	down-regulation	PFC
ARHGEF2	9181	down-regulation	PFC
SORCS2	57537	down-regulation	PFC
NEDD9	4739	down-regulation	PFC
NACAD	23148	down-regulation	PFC
PIM3	415116	down-regulation	PFC
CASKIN1	57524	down-regulation	PFC
ESS2	8220	down-regulation	PFC
TPBG	7162	down-regulation	PFC
FSCN1	6624	down-regulation	PFC
LY6E	4061	down-regulation	PFC
IL1RL2	8808	down-regulation	PFC
C2orf81	388963	down-regulation	PFC
B3GAT1	27087	down-regulation	PFC
CDC37	11140	down-regulation	PFC
ERF	2077	down-regulation	PFC
FAM43B	163933	down-regulation	PFC
ARG2	384	down-regulation	PFC
FLRT1	23769	down-regulation	PFC
APLP1	333	down-regulation	PFC
MCOLN1	57192	down-regulation	PFC
CAMK2B	816	down-regulation	PFC
HOMER3	9454	down-regulation	PFC
SCAND1	51282	down-regulation	PFC
SOWAHB	345079	down-regulation	PFC
C17orf107	100130311	down-regulation	PFC
IPO13	9670	down-regulation	PFC
CDK11A	728642	down-regulation	PFC
RPUSD1	113000	down-regulation	PFC
CNTN6	27255	down-regulation	PFC
DHCR24	1718	down-regulation	PFC
HS1BP3	64342	down-regulation	PFC
ZNF687	57592	down-regulation	PFC
CCDC124	115098	down-regulation	PFC
BCOR	54880	down-regulation	PFC
STK40	83931	down-regulation	PFC
CERS1	10715	down-regulation	PFC
SEMA5B	54437	down-regulation	PFC
MYL5	4636	down-regulation	PFC
SMIM29	221491	down-regulation	PFC
INPP5D	3635	down-regulation	PFC
RGS3	5998	down-regulation	PFC
MCHR1	2847	down-regulation	PFC
TBC1D10A	83874	down-regulation	PFC
NACC1	112939	down-regulation	PFC
SARM1	23098	down-regulation	PFC
RASAL1	8437	down-regulation	PFC
CA4	762	down-regulation	PFC
DPYSL4	10570	down-regulation	PFC
ADAP1	11033	down-regulation	PFC
ISG20L2	81875	down-regulation	PFC
CASKIN2	57513	down-regulation	PFC
FKBP1C	642489	down-regulation	PFC
TSTA3	7264	down-regulation	PFC
FAM207A	85395	down-regulation	PFC
UBE2S	27338	down-regulation	PFC
SH2B3	10019	down-regulation	PFC
UBXN6	80700	down-regulation	PFC
PUSL1	126789	down-regulation	PFC
KCNH2	3757	down-regulation	PFC
FASN	2194	down-regulation	PFC
CSNK1G2	1455	down-regulation	PFC
ZNF786	136051	down-regulation	PFC
STRN4	29888	down-regulation	PFC
LARP6	55323	down-regulation	PFC
DCAF15	90379	down-regulation	PFC
BORCS6	54785	down-regulation	PFC
BATF3	55509	down-regulation	PFC
NFKBIB	4793	down-regulation	PFC
SCNN1D	6339	down-regulation	PFC
RPS6KA4	8986	down-regulation	PFC
NGEF	25791	down-regulation	PFC
TM7SF2	7108	down-regulation	PFC
MCF2L	23263	down-regulation	PFC
FBLL1	345630	down-regulation	PFC
FNTB	2342	down-regulation	PFC
USP2	9099	down-regulation	PFC
RAB33A	9363	down-regulation	PFC
DPH6	89978	up-regulation	PFC
SLC2A10	81031	up-regulation	PFC
MGST2	4258	up-regulation	PFC
PPP1R3E	90673	up-regulation	PFC
ZNF785	146540	up-regulation	PFC
ZNF726	730087	up-regulation	PFC
GPR18	2841	up-regulation	PFC
SGK494	124923	up-regulation	PFC
RTL8A	26071	up-regulation	PFC
PLSCR4	57088	up-regulation	PFC
GPR171	29909	up-regulation	PFC
ZNF69	7620	up-regulation	PFC
LEPR	3953	up-regulation	PFC
RIDA	10247	up-regulation	PFC
ITGA8	8516	up-regulation	PFC
MMAA	166785	up-regulation	PFC
PZP	5858	up-regulation	PFC
LXN	56925	up-regulation	PFC
EMX2	2018	up-regulation	PFC
TIGD4	201798	up-regulation	PFC
PUS7L	83448	up-regulation	PFC
C10orf113	387638	up-regulation	PFC
YY2	404281	up-regulation	PFC
CYB5B	80777	up-regulation	PFC
MFAP3	4238	up-regulation	PFC
GRAMD1C	54762	up-regulation	PFC
FABP6	2172	up-regulation	PFC
ABCC9	10060	up-regulation	PFC
SOSTDC1	25928	up-regulation	PFC
SBSPON	157869	up-regulation	PFC
ZMYND12	84217	up-regulation	PFC
SMIM30	401397	up-regulation	PFC
CRLS1	54675	up-regulation	PFC
POLE	5426	up-regulation	PFC
INPP5F	22876	up-regulation	PFC
COLCA2	120376	up-regulation	PFC
GLIPR1L1	256710	up-regulation	PFC
KANK2	25959	up-regulation	PFC
TVP23C	201158	up-regulation	PFC
RBPMS	11030	up-regulation	PFC
CBWD5	220869	up-regulation	PFC
CCDC144A	9720	up-regulation	PFC
TAS2R30	259293	up-regulation	PFC
BBOX1	8424	up-regulation	PFC
EFCAB13	124989	up-regulation	PFC
ZNF559	84527	up-regulation	PFC
ZNF91	7644	up-regulation	PFC
SLC9A2	6549	up-regulation	PFC
GPR82	27197	up-regulation	PFC
DNAAF4	161582	up-regulation	PFC
LRRC17	10234	up-regulation	PFC
DDIT4L	115265	up-regulation	PFC
ABHD14B	84836	up-regulation	PFC
GNRHR	2798	up-regulation	PFC
SLC44A3	126969	up-regulation	PFC
SLC7A11	23657	up-regulation	PFC
IQCE	23288	up-regulation	PFC
RANBP3L	202151	up-regulation	PFC
KIAA0391	9692	up-regulation	PFC
RANBP17	64901	up-regulation	PFC
USP17L2	377630	up-regulation	PFC
RAD54B	25788	up-regulation	PFC
EFEMP1	2202	up-regulation	PFC
BHMT2	23743	up-regulation	PFC
FAM71C	196472	up-regulation	PFC
TAS2R10	50839	up-regulation	PFC
SEC14L6	730005	up-regulation	PFC
ACKR4	51554	up-regulation	PFC
HIST2H2AC	8338	up-regulation	PFC
CHMP2B	25978	up-regulation	PFC
FAM24B	196792	up-regulation	PFC
DAW1	164781	up-regulation	PFC
DNAJB7	150353	up-regulation	PFC
THSD4	79875	up-regulation	PFC
HIST1H3A	8350	up-regulation	PFC
ZIC4	84107	up-regulation	PFC
SERPING1	710	up-regulation	PFC
FAM198A	729085	up-regulation	PFC
MYBPC1	4604	up-regulation	PFC
TEX9	374618	up-regulation	PFC
CRIP3	401262	up-regulation	PFC
SRP9	6726	up-regulation	PFC
C17orf78	284099	up-regulation	PFC
ECM2	1842	up-regulation	PFC
ANGPTL3	27329	up-regulation	PFC
ZIC5	85416	up-regulation	PFC
BSPRY	54836	up-regulation	PFC
IL18	3606	up-regulation	PFC
MC4R	4160	up-regulation	PFC
LRRC2	79442	up-regulation	PFC
BMPR1B	658	up-regulation	PFC
OR10A5	144124	up-regulation	PFC
FSIP2	401024	up-regulation	PFC
ALS2CL	259173	up-regulation	PFC
MEPE	56955	up-regulation	PFC
FAM86B2	653333	up-regulation	PFC
MTRNR2L4	100463285	up-regulation	PFC
SLC6A16	28968	up-regulation	PFC
KLRG1	10219	up-regulation	PFC
ZNF260	339324	up-regulation	PFC
TSPAN2	10100	up-regulation	PFC
MT1F	4494	up-regulation	PFC
DNPH1	10591	up-regulation	PFC
APOL1	8542	up-regulation	PFC
SLC22A3	6581	up-regulation	PFC
ADIRF	10974	up-regulation	PFC
PLA2R1	22925	up-regulation	PFC
ISLR	3671	up-regulation	PFC
IFNE	338376	up-regulation	PFC
SLC16A9	220963	up-regulation	PFC
ADAMTS2	9509	up-regulation	PFC
FOXD1	2297	up-regulation	PFC
BMP4	652	up-regulation	PFC
LHCGR	3973	up-regulation	PFC
CFH	3075	up-regulation	PFC
GOLGA8H	728498	up-regulation	PFC
PTGFR	5737	up-regulation	PFC
LRRC19	64922	up-regulation	PFC
GMPR	2766	up-regulation	PFC
SLC7A3	84889	up-regulation	PFC
ZIC2	7546	up-regulation	PFC
CTAGE9	643854	up-regulation	PFC
SCGN	10590	up-regulation	PFC
CTDSPL	10217	up-regulation	PFC
ZNF648	127665	up-regulation	PFC
ITPRIPL1	150771	up-regulation	PFC
ACTA2	59	up-regulation	PFC
CEMIP	57214	up-regulation	PFC
OR3A3	8392	up-regulation	PFC
TMEM30B	161291	up-regulation	PFC
KCNRG	283518	up-regulation	PFC
ARHGEF5	7984	up-regulation	PFC
CA1	759	up-regulation	PFC
SLC7A2	6542	up-regulation	PFC
TNFRSF11B	4982	up-regulation	PFC
ACADL	33	up-regulation	PFC
CLDN18	51208	up-regulation	PFC
SLC22A6	9356	up-regulation	PFC
DIAPH3	81624	up-regulation	PFC
SLC22A8	9376	up-regulation	PFC
SPTLC3	55304	up-regulation	PFC
SLC26A2	1836	up-regulation	PFC
MEI4	101928601	up-regulation	PFC
FOXL1	2300	up-regulation	PFC
IFITM2	10581	up-regulation	PFC
WDR63	126820	up-regulation	PFC
CHODL	140578	up-regulation	PFC
CRABP1	1381	up-regulation	PFC
SAXO2	283726	up-regulation	PFC
OR2A42	402317	up-regulation	PFC
ACPP	55	up-regulation	PFC
OR2L5	81466	up-regulation	PFC
PATE1	160065	up-regulation	PFC
MT1X	4501	up-regulation	PFC
BNC2	54796	up-regulation	PFC
OGN	4969	up-regulation	PFC
COL1A2	1278	up-regulation	PFC
MT1E	4493	up-regulation	PFC
ADRB3	155	up-regulation	PFC
OR2A1	346528	up-regulation	PFC
PRDM6	93166	up-regulation	PFC
CYP3A43	64816	up-regulation	PFC
SLC47A1	55244	up-regulation	PFC
INSL6	11172	up-regulation	PFC
MT1G	4495	up-regulation	PFC
SLC38A4	55089	up-regulation	PFC
C7	730	up-regulation	PFC
FMOD	2331	up-regulation	PFC
SLC6A13	6540	up-regulation	PFC
ADH1B	125	up-regulation	PFC
MT1M	4499	up-regulation	PFC
OR1C1	26188	up-regulation	PFC
DSP	1832	up-regulation	PFC
SCARA5	286133	up-regulation	PFC
UBL4B	164153	up-regulation	PFC
MS4A8	83661	up-regulation	PFC
SLC16A12	387700	up-regulation	PFC
SERPIND1	3053	up-regulation	PFC
FRG2B	441581	up-regulation	PFC
DAPL1	92196	up-regulation	PFC
GADL1	339896	up-regulation	PFC
MUSTN1	389125	up-regulation	PFC
PTGDR	5729	up-regulation	PFC
SMTNL2	342527	up-regulation	PFC
OSR1	130497	up-regulation	PFC
SLC26A7	115111	up-regulation	PFC
MLPH	79083	up-regulation	PFC
RLN2	6019	up-regulation	PFC
USP17L5	728386	up-regulation	PFC
STRA6	64220	up-regulation	PFC
SLC13A4	26266	up-regulation	PFC
FAM170A	340069	up-regulation	PFC
SLC6A20	54716	up-regulation	PFC
MARCO	8685	up-regulation	PFC
C17orf47	284083	up-regulation	PFC
FOXC2	2303	up-regulation	PFC
FOXD2	2306	up-regulation	PFC
SLPI	6590	up-regulation	PFC
KLHDC7A	127707	up-regulation	PFC
OTOS	150677	up-regulation	PFC
TDRD15	100129278	up-regulation	PFC
OR10H1	26539	up-regulation	PFC
SLC5A5	6528	up-regulation	PFC
INSRR	3645	up-regulation	PFC
