# Supplementary material for: Integrated Analysis of Brain Transcriptome Reveals Convergent Molecular Pathways in Autism Spectrum Disorder
Source: Front Psychiatry. 2019 Oct 8;10:706. doi: 10.3389/fpsyt.2019.00706 (PMC6795181; doi:10.3389/fpsyt.2019.00706)
Supplement: Supplementary file 5 [file Table_5.xls]

## Sheet: sheet1
Suplementary Table 5. Pivot regulators of ASD-related modules..
Tissue	Module	Pivot_Regulators	Gene_id/Mirbase_id	Type	Module_Links	p-value	Target_genes
CC	4	EZH2	2146	TF	3	0.0299624	CCNE1/APC/FBXO32
CC	4	MYC	4609	TF	5	0.0267969	CCNE1/CYP3A4/CDC34/KRAS/MAPK1
CC	4	CREB1	1385	TF	5	0.0177915	PCSK1/GSK3B/CCK/NMNAT2/VIP
CC	4	REST	5978	TF	5	0.00017297	PCSK1/VIP/TAC3/TUBB3/GABRB3
CC	4	CDX2	1045	TF	3	0.0165543	APC/GSK3B/UGT1A8
CC	4	FOXM1	2305	TF	2	0.0331583	CYP3A4/CDC25A
CC	4	HNF4A	3172	TF	3	0.0405429	CYP3A4/UGT2B7/CYP2C8
CC	4	RXRA	6256	TF	2	0.0448405	CYP3A4/GNRH2
CC	4	NFE2L2	4780	TF	2	0.0295774	UGT2B7/GSTA1
CC	6	SP1	6667	TF	10	0.0450347	DDB2/HRAS/PDGFB/PTHLH/PDE6B/GRK2/ALOX15B/PTK6/SRC/VAMP2
CC	6	TP63	8626	TF	2	0.0131667	DDB2/SMARCD3
CC	6	MTA1	9112	TF	2	0.0323588	MTA3/SMAD7
CC	17	FLI1	2313	TF	2	0.00655023	EP300/ITGA2B
CC	17	E2F1	1869	TF	4	0.00421375	E2F1/CREBBP/MAP3K5/NRIP1
CC	17	RB1	5925	TF	2	0.0108027	E2F1/MAP3K5
CC	17	POU2F1	5451	TF	2	0.0159874	SPP1/TXNRD1
CC	29	PPARG	5468	TF	2	0.0103636	PTEN/RARB
CC	29	TFAP2A	7020	TF	2	0.0119328	PTEN/KIT
CC	6	MALAT1	378938	LncRNA	32	0.0132641	SMAD7/CENPI/RGMB/DDB2/LAMB3/RCL1/RAD50/CDC6/ESF1/TRIB3/DRD1/EXO1/HTR7/KIF17/CACNA1C/FGF1/POLQ/FRS2/FANCA/ADRA1B/PAK6/GPR176/FBXW10/GRPR/PLB1/NEDD4L/NEK2/B3GNT9/LPCAT4/NRG1/CCNF/HTR1B
CC	6	CDKN2B-AS1	100048912	LncRNA	2	0.00411062	SUZ12/HRAS
CC	6	UCA1	652995	LncRNA	2	0.0202093	FGF1/PDGFB
CC	17	UCA1	652995	LncRNA	2	0.00744485	EP300/AKT3
CC	29	BANCR	100885775	LncRNA	4	0.017001	NLRP2/OPRL1/ZP2/TRHR
CC	4	hsa-miR-34a-5p	MIMAT0000255	miRNA	7	0.0491365	MAPK1/HPRT1/MAP2K1/CDC25A/EPHA5/SYT1/GRM7
CC	4	hsa-miR-130b-3p	MIMAT0000691	miRNA	10	0.0312268	MAPK1/MID1IP1/HPRT1/ATP6V1B2/WASL/GNB5/EPHA4/ATP6V1C1/ERBIN/TRIM37
CC	4	hsa-miR-3666	MIMAT0018088	miRNA	7	0.00209864	MAPK1/MID1IP1/HPRT1/ATP6V1B2/WASL/ERBIN/TRIM37
CC	4	hsa-miR-301a-3p	MIMAT0000688	miRNA	9	0.0064155	MAPK1/MID1IP1/HPRT1/ATP6V1B2/WASL/ATP6V1C1/ERBIN/TRIM37/TIMP2
CC	4	hsa-miR-301b-3p	MIMAT0004958	miRNA	8	0.0136264	MAPK1/MID1IP1/HPRT1/ATP6V1B2/WASL/ATP6V1C1/ERBIN/TRIM37
CC	4	hsa-miR-27b-3p	MIMAT0000419	miRNA	8	0.0192244	MAPK1/SPATA13/KRAS/WASL/PISD/RET/CYP3A4/APC
CC	4	hsa-miR-130a-3p	MIMAT0000425	miRNA	9	0.009061	MAPK1/MID1IP1/HPRT1/ATP6V1B2/WASL/ATP6V1C1/ERBIN/TRIM37/ZFPM2
CC	4	hsa-miR-15b-5p	MIMAT0000417	miRNA	14	0.00100214	MAPK1/BAG4/PAK2/B3GNT2/KIF5B/PISD/YWHAH/MAP2K4/SLC25A12/CDC25A/MYO5A/CCNE1/CPSF7/SYNJ1
CC	4	hsa-miR-4295	MIMAT0016844	miRNA	7	0.00209864	MAPK1/MID1IP1/HPRT1/ATP6V1B2/WASL/ERBIN/TRIM37
CC	4	hsa-miR-454-3p	MIMAT0003885	miRNA	8	0.0202131	MAPK1/MID1IP1/HPRT1/ATP6V1B2/WASL/ATP6V1C1/ERBIN/TRIM37
CC	4	hsa-miR-27a-3p	MIMAT0000084	miRNA	8	0.0239597	SPATA13/KRAS/GNB5/MAP2K4/BAK1/DKK2/CYP3A4/APC
CC	4	hsa-miR-30c-5p	MIMAT0000244	miRNA	8	0.0111629	KRAS/ARF3/BAG4/QRFPR/KIF5B/SLC25A12/MAP2K1/TFDP1
CC	4	hsa-let-7b-5p	MIMAT0000063	miRNA	14	0.00295631	KRAS/ATXN7L3/WASL/ADIPOR2/GNAS/EPHA4/MEF2C/CDC25A/PAK1/TLN1/DCTPP1/RRP8/ATP6V0A1/CDC34
CC	4	hsa-let-7a-5p	MIMAT0000062	miRNA	9	0.0240192	KRAS/ATXN7L3/WASL/ADIPOR2/ACVR1B/EPHA4/CDC25A/PAK1/CDC34
CC	4	hsa-miR-429	MIMAT0001536	miRNA	9	1.56377e-05	KRAS/BAG4/PAK2/SEC23A/ERBIN/TUBB2A/TIMP2/ZFPM2/BAP1
CC	4	hsa-miR-873-5p	MIMAT0004953	miRNA	4	0.00453633	KRAS/PISD/GBA2/PPP2R5E
CC	4	hsa-let-7c-5p	MIMAT0000064	miRNA	9	0.00857066	KRAS/ATXN7L3/WASL/ADIPOR2/ACVR1B/EPHA4/MEF2C/CDC25A/PAK1
CC	4	hsa-miR-181c-5p	MIMAT0000258	miRNA	4	0.0373229	KRAS/FAM3C/RNF6/PPP2R5E
CC	4	hsa-let-7g-5p	MIMAT0000414	miRNA	8	0.0114929	KRAS/ATXN7L3/WASL/ADIPOR2/EPHA4/CDC25A/PAK1/MAPK14
CC	4	hsa-miR-200c-3p	MIMAT0000617	miRNA	11	9.34305e-05	KRAS/BAG4/ELAVL2/PAK2/SEC23A/ERBIN/TUBB2A/TIMP2/ZFPM2/BAP1/TUBB3
CC	4	hsa-miR-224-5p	MIMAT0000281	miRNA	4	0.0317488	KRAS/GSK3B/PAK2/NPTN
CC	4	hsa-miR-330-5p	MIMAT0004693	miRNA	2	0.0147084	KRAS/SH3GL2
CC	4	hsa-miR-181d-5p	MIMAT0002821	miRNA	4	0.0358798	KRAS/FAM3C/RNF6/PPP2R5E
CC	4	hsa-miR-362-3p	MIMAT0004683	miRNA	3	0.0461981	ARF3/MAPK14/SRSF4
CC	4	hsa-miR-190a-3p	MIMAT0026482	miRNA	9	0.00501462	ADCYAP1/GSK3B/WASL/FZD5/NPTN/ASB11/DTX4/KCNJ3/PPP2R5E
CC	4	hsa-miR-5011-5p	MIMAT0021045	miRNA	9	0.00517534	ADCYAP1/GSK3B/WASL/FZD5/NPTN/ASB11/DTX4/KCNJ3/PPP2R5E
CC	4	hsa-miR-1277-5p	MIMAT0022724	miRNA	5	0.0198989	ADCYAP1/WASL/FZD5/NPTN/KCNJ3
CC	4	hsa-miR-26b-5p	MIMAT0000083	miRNA	10	0.020366	GSK3B/ELAVL2/TRAF3/RNF6/MEF2C/MDH1/PAK1/CCNE1/CPSF7/COL12A1
CC	4	hsa-miR-26a-5p	MIMAT0000082	miRNA	7	0.0104486	GSK3B/BAG4/RNF6/UBE2A/MYH10/CCNE1/FGF9
CC	4	hsa-miR-369-3p	MIMAT0000721	miRNA	2	0.0102372	GSK3B/FZD5
CC	4	hsa-miR-182-5p	MIMAT0000259	miRNA	6	0.00441939	GSK3B/CITED2/ACVR1B/PRKAA2/BARD1/FGF9
CC	4	hsa-miR-135a-5p	MIMAT0000428	miRNA	3	0.014833	GSK3B/HTR1A/APC
CC	4	hsa-miR-135b-5p	MIMAT0000758	miRNA	4	0.00453633	GSK3B/ACVR1B/MEF2C/APC
CC	4	hsa-miR-202-3p	MIMAT0002811	miRNA	4	0.010848	ATXN7L3/WASL/ADIPOR2/EPHA4
CC	4	hsa-let-7f-5p	MIMAT0000067	miRNA	7	0.0441542	ATXN7L3/WASL/ADIPOR2/EPHA4/SLC25A12/CDC25A/PAK1
CC	4	hsa-miR-103a-3p	MIMAT0000101	miRNA	9	0.0192513	HPRT1/CITED2/B3GNT2/YWHAH/CDC25A/PRKCE/CCNE1/SYNJ1/CYP2C8
CC	4	hsa-miR-107	MIMAT0000104	miRNA	8	0.00724592	HPRT1/B3GNT2/YWHAH/COPS7A/PRKCE/CCNE1/CHRM1/CYP2C8
CC	4	hsa-miR-424-5p	MIMAT0001341	miRNA	13	0.000834038	BAG4/PAK2/B3GNT2/KIF5B/PISD/YWHAH/SLC25A12/ITPR1/MAP2K1/CDC25A/MYO5A/CCNE1/CPSF7
CC	4	hsa-miR-497-5p	MIMAT0002820	miRNA	12	0.00213929	BAG4/PAK2/B3GNT2/KIF5B/PISD/YWHAH/SLC25A12/MAP2K1/CDC25A/MYO5A/CCNE1/CPSF7
CC	4	hsa-miR-488-3p	MIMAT0004763	miRNA	3	0.0281826	BAG4/PRDM2/ERBIN
CC	4	hsa-miR-195-5p	MIMAT0000461	miRNA	14	0.000461406	BAG4/PAK2/B3GNT2/KIF5B/PISD/YWHAH/SLC25A12/CDC25A/MYO5A/CCNE1/CPSF7/FLT3/KIF21A/RET
CC	4	hsa-miR-15a-5p	MIMAT0000068	miRNA	12	0.00646888	BAG4/PAK2/B3GNT2/KIF5B/PISD/YWHAH/SLC25A12/CDC25A/MYO5A/CCNE1/CPSF7/RET
CC	4	hsa-miR-200b-3p	MIMAT0000318	miRNA	8	0.00105146	BAG4/PAK2/SEC23A/ERBIN/TUBB2A/TIMP2/ZFPM2/BAP1
CC	4	hsa-miR-32-5p	MIMAT0000090	miRNA	11	0.00101807	WASL/TRAF3/KIF5B/YWHAH/MAP2K4/UBE2Z/ITPR1/MYO5A/ERBIN/BAK1/SYNJ1
CC	4	hsa-miR-92b-3p	MIMAT0003218	miRNA	7	0.0289819	WASL/KIF5B/MAP2K4/UBE2Z/ITPR1/BAK1/PGAM1
CC	4	hsa-miR-363-3p	MIMAT0000707	miRNA	6	0.0277343	WASL/KIF5B/MAP2K4/UBE2Z/ITPR1/BAK1
CC	4	hsa-miR-142-3p	MIMAT0000434	miRNA	5	0.0434792	WASL/GNAS/KIF5B/NCKAP1/APC
CC	4	hsa-miR-367-3p	MIMAT0000719	miRNA	6	0.0217378	WASL/KIF5B/MAP2K4/UBE2Z/ITPR1/BAK1
CC	4	hsa-miR-375	MIMAT0000728	miRNA	5	0.0339611	ELAVL2/ADIPOR2/SEC23A/EXOC6/MAP2K4
CC	4	hsa-miR-141-3p	MIMAT0000432	miRNA	7	0.00170931	ELAVL2/SEC23A/CDC25A/ERBIN/MAPK14/ZFPM2/BAP1
CC	4	hsa-miR-200a-3p	MIMAT0000682	miRNA	6	0.00537293	ELAVL2/SEC23A/ERBIN/MAPK14/ZFPM2/BAP1
CC	4	hsa-miR-125a-3p	MIMAT0004602	miRNA	3	0.0216687	GNAS/PISD/GBA2
CC	4	hsa-miR-129-5p	MIMAT0000242	miRNA	4	0.0154456	TRAF3/PRKCE/RET/APC
CC	4	hsa-miR-448	MIMAT0001532	miRNA	5	0.00108482	ACVR1B/RNF6/DTX4/ITPR1/MAP2K1
CC	4	hsa-miR-505-3p	MIMAT0002876	miRNA	3	0.026467	FZD5/PISD/MYH10
CC	4	hsa-miR-494-3p	MIMAT0002816	miRNA	4	0.038799	NPTN/ITPR1/MAP2K1/ZFPM2
CC	4	hsa-miR-297	MIMAT0004450	miRNA	2	0.0426834	ASB11/KCNJ3
CC	4	hsa-miR-330-3p	MIMAT0000751	miRNA	2	0.0147084	YWHAH/SH3GL2
CC	4	hsa-miR-222-3p	MIMAT0000279	miRNA	5	0.0487841	PPP2R1A/CABYR/UBE2N/TIMP2/DKK2
CC	4	hsa-miR-449a	MIMAT0001541	miRNA	4	0.0191019	ITPR1/MAP2K1/CDC25A/GRM7
CC	4	hsa-miR-34b-3p	MIMAT0004676	miRNA	2	0.0426834	ITPR1/MAP2K1
CC	4	hsa-miR-144-5p	MIMAT0004600	miRNA	2	0.00145243	CDC25A/CCNE1
CC	6	hsa-miR-489-3p	MIMAT0002805	miRNA	2	0.000584246	GNAL/SUZ12
CC	6	hsa-miR-128-3p	MIMAT0000424	miRNA	6	0.00754789	E2F3/SUZ12/TUB/EPHB1/LAMB3/NEK2
CC	6	hsa-miR-203a-3p	MIMAT0000264	miRNA	4	0.0425741	E2F3/SUZ12/TRIM71/SRC
CC	6	hsa-miR-503-5p	MIMAT0002874	miRNA	4	0.0138373	E2F3/SMAD7/CCNF/FANCA
CC	6	hsa-miR-217	MIMAT0000274	miRNA	2	0.0315504	E2F3/SMAD7
CC	6	hsa-miR-200b-3p	MIMAT0000318	miRNA	4	0.0185353	E2F3/SUZ12/FRS2/WNT1
CC	6	hsa-miR-33a-5p	MIMAT0000091	miRNA	3	0.0297825	SMAD7/SRC/PTHLH
CC	17	hsa-miR-34a-5p	MIMAT0000255	miRNA	5	0.0032503	EP300/NCBP2/BAZ2A/E2F1/ARHGAP1
CC	17	hsa-miR-32-5p	MIMAT0000090	miRNA	4	0.0245861	EP300/GATAD2B/PRMT5/E2F1
CC	17	hsa-miR-342-3p	MIMAT0000753	miRNA	2	0.0297815	EP300/E2F1
CC	17	hsa-miR-19b-3p	MIMAT0000074	miRNA	5	0.0443484	EP300/NCBP2/TAF4/E2F1/ARHGAP1
CC	17	hsa-miR-7-5p	MIMAT0000252	miRNA	6	0.000794757	GATAD2B/TMED2/AKT3/TAF4/PIGH/EIF4E
CC	17	hsa-miR-449b-5p	MIMAT0003327	miRNA	3	0.00207045	BAZ2A/E2F1/ARHGAP1
CC	17	hsa-miR-449a	MIMAT0001541	miRNA	3	0.00370959	BAZ2A/E2F1/ARHGAP1
CC	17	hsa-miR-107	MIMAT0000104	miRNA	4	0.0105152	BAZ2A/E2F1/NFIX/ARNT
CC	17	hsa-miR-223-3p	MIMAT0000280	miRNA	4	0.000593082	E2F1/TRIM21/NFIX/ARNT
CC	17	hsa-miR-206	MIMAT0000462	miRNA	2	0.0380597	EIF4E/TKT
CC	29	hsa-miR-144-3p	MIMAT0000436	miRNA	2	0.0373702	CERK/PTEN
CC	29	hsa-miR-335-5p	MIMAT0000765	miRNA	2	0.0334147	KMT2C/KIT
CC	29	hsa-miR-199b-5p	MIMAT0000263	miRNA	2	0.00210046	TMOD2/KIT
CC	29	hsa-miR-103a-3p	MIMAT0000101	miRNA	3	0.0138363	STAMBPL1/OTUD7B/PTEN
CC	29	hsa-miR-221-3p	MIMAT0000278	miRNA	2	0.0477583	KIT/PTEN
CC	29	hsa-miR-494-3p	MIMAT0002816	miRNA	3	0.000536832	KIT/PTTG1/PTEN
CC	29	hsa-miR-222-3p	MIMAT0000279	miRNA	2	0.0264426	KIT/PTEN
CC	29	hsa-miR-329-3p	MIMAT0001629	miRNA	2	0.00319325	PTTG1/CLTB
CC	29	hsa-miR-492	MIMAT0002812	miRNA	2	0.000583843	PTEN/BID
PFC	2	DDB2	1643	TF	2	0.00107993	BCL2/XPA
PFC	2	ERCC2	2068	TF	2	0.00947081	BCL2/XPA
PFC	2	MYC	4609	TF	5	0.0417577	BCL2/CCNE1/CD38/CDC34/WRN
PFC	2	PARP1	142	TF	3	0.0115503	BCL2/IFNG/HTR1A
PFC	2	RELA	5970	TF	11	0.0263775	BCL2/XIAP/IFNG/SIRT1/PPARA/YY1/CD38/CYP2E1/CARM1/CRHR1/GRIN1
PFC	2	SATB1	6304	TF	2	0.0325738	BCL2/IL5
PFC	2	ZBTB16	7704	TF	2	0.0148483	BCL2/BID
PFC	2	MSC	9242	TF	2	0.0179248	CDC6/IFNG
PFC	2	EP300	2033	TF	4	0.0216639	CCNE1/IFNG/IL5/YY1
PFC	2	PROX1	5629	TF	2	0.0179248	CCNE1/IFNG
PFC	2	GATA3	2625	TF	3	0.035516	IFNG/IL5/IL12RB2
PFC	2	NFATC1	4772	TF	3	0.000225036	IFNG/CYP2E1/EGR3
PFC	2	NFATC2	4773	TF	2	0.00719189	IFNG/EGR3
PFC	2	TBX21	30009	TF	2	0.0212457	IFNG/YY1
PFC	2	ATF4	468	TF	3	0.0286944	CHAC1/HRK/SIRT1
PFC	2	ATF6	22926	TF	2	0.02858	DNAJC3/SRF
PFC	2	SPI1	6688	TF	4	0.0302167	IL5/NSFL1C/SCARB2/TNFRSF11A
PFC	2	KAT2B	8850	TF	3	0.00169285	YY1/SMAD4/NPAS2
PFC	6	BRCA1	672	TF	3	0.0204373	EP300/IGF1R/JAK2
PFC	6	PML	5371	TF	2	0.0160289	EP300/CASP3
PFC	6	TP53	7157	TF	5	0.0253877	IGF1R/TCF7L2/MAD1L1/HSF1/CASP3
PFC	6	SREBF1	6720	TF	2	0.0312444	FASN/LRP1
PFC	8	AR	367	TF	4	0.0348318	CDH1/CDK6/CYP7B1/KLF5
PFC	8	DNMT1	1786	TF	3	0.00783138	CDH1/HDAC1/SFRP1
PFC	8	EZH2	2146	TF	3	0.0158287	CDH1/HDAC1/SFRP1
PFC	8	HDAC1	3065	TF	4	0.0143403	CDH1/SP1/ALOX15/SFRP1
PFC	8	HMGA1	3159	TF	2	0.0211246	CDH1/SP1
PFC	8	KLF6	1316	TF	3	0.00220154	CDH1/CERS2/PTTG1
PFC	8	MTA1	9112	TF	3	0.00376485	CDH1/ALOX15/HDAC1
PFC	8	TCF3	6929	TF	3	0.000743706	CDH1/CDK6/EXO1
PFC	8	NANOG	79923	TF	2	0.0373525	CDK6/LAMB1
PFC	8	SP1	6667	TF	15	0.000788348	CDK6/CYP7B1/XPC/NPY/PTHLH/CBFB/CYP27A1/CERS2/PTTG1/PDE6B/ADRB3/CXCL14/DHCR24/GIPR/ITGA2
PFC	8	CREB1	1385	TF	4	0.0313781	SLC22A8/XPC/GRPR/NPY
PFC	8	RFX1	5989	TF	3	0.000920931	HLA-DPB1/HDAC1/FGF1
PFC	2	IFNG-AS1	100885789	LncRNA	2	0.000330659	WDR5/IFNG
PFC	6	FENDRR	400550	LncRNA	46	0.021562	CASP3/MAD1L1/TCF7L2/DVL3/TAF9B/BCCIP/PAK4/EP300/CSNK1E/DERL2/AGO2/LRP1/SIN3B/PLXND1/HGS/ZYX/BIRC2/ERCC1/LSM8/SPHK2/MRPS31/SSR3/RPL8/DDX56/HS1BP3/MTA1/FOXK1/CREBBP/EPN1/MRPS28/MGRN1/SMPD1/MRPL10/DEDD2/SIN3A/PCGF2/SEC22C/IGF1R/SYN3/MIB2/SMARCC2/CERS1/HERC4/GAK/DNMT3A/RPL22L1
PFC	6	UCA1	652995	LncRNA	2	0.0278574	CASP3/EP300
PFC	8	TUG1	55000	LncRNA	34	0.0200221	KLF5/IQGAP1/CDKN2C/GAB1/FAXDC2/NFE2L2/DHCR24/PWP2/LAMB1/CDK6/EXO1/PPP2R1B/PLPP1/GSN/KCNJ2/SNX9/CCNE2/MYLK/PTTG1/LPCAT2/COL12A1/IRF2/PAK2/CCNB3/KIF13B/MYO6/RHOU/TRAF1/CBFB/SYNJ2/H2AFJ/HDAC1/LIPA/PLA2G4C
PFC	2	hsa-miR-7-5p	MIMAT0000252	miRNA	12	0.00202711	XIAP/YY1/ADCY9/IRS1/HRH2/RBPJ/BCL2/CRTAP/CCNE1/AK3/AP1M1/PIK3CD
PFC	2	hsa-miR-130a-3p	MIMAT0000425	miRNA	9	0.0325597	XIAP/SMAD4/YY1/HADHB/GALNT4/EGR3/PPARA/BCL2/MAFB
PFC	2	hsa-miR-181a-5p	MIMAT0000256	miRNA	9	0.0402747	XIAP/BCL2/PRKCD/INCENP/IFNG/PRAP1/SLC25A25/SIRT1/CARM1
PFC	2	hsa-miR-155-5p	MIMAT0000646	miRNA	13	0.0335118	XIAP/SMAD4/BCL2/MSH6/ANAPC16/TBC1D8B/MAP1LC3A/KLHL5/SECISBP2/BET1/MAFB/MAP3K10/CHAF1A
PFC	2	hsa-miR-96-5p	MIMAT0000095	miRNA	7	0.00572702	XIAP/FOSL2/BCL2/HTR1B/KCNH2/SLC25A25/ADCY6
PFC	2	hsa-miR-181b-5p	MIMAT0000257	miRNA	8	0.00154364	XIAP/ADCY9/ARHGAP35/BCL2/SLC25A25/SIRT1/MAP3K10/CARM1
PFC	2	hsa-miR-125a-5p	MIMAT0000443	miRNA	6	0.0216118	SMAD4/SCARB2/IFNG/ANAPC16/DLG4/TSTA3
PFC	2	hsa-miR-449a	MIMAT0001541	miRNA	4	0.0382357	SMAD4/MDM4/BCL2/SIRT1
PFC	2	hsa-miR-26a-5p	MIMAT0000082	miRNA	9	0.00305632	SMAD4/NUP205/CHAC1/PRKCD/MSH6/CCNE1/PIK3C2A/CDC6/ADAM17
PFC	2	hsa-miR-34c-5p	MIMAT0000686	miRNA	5	0.0242558	SMAD4/YY1/MDM4/BCL2/SIRT1
PFC	2	hsa-miR-182-5p	MIMAT0000259	miRNA	6	0.0123402	SMAD4/FOSL2/BCL2/ATF1/BARD1/ADCY6
PFC	2	hsa-miR-483-3p	MIMAT0002173	miRNA	3	0.00342951	SMAD4/SRF/RASGRF1
PFC	2	hsa-miR-376a-3p	MIMAT0000729	miRNA	3	0.0241817	CD2AP/FOXG1/SLC16A1
PFC	2	hsa-miR-503-5p	MIMAT0002874	miRNA	7	0.00910894	CD2AP/DMTF1/CHAC1/BCL2/CCNE1/CCNF/TNFRSF11A
PFC	2	hsa-miR-488-3p	MIMAT0004763	miRNA	3	0.0486237	EEF2/SLC16A1/ANAPC16
PFC	2	hsa-miR-361-5p	MIMAT0000703	miRNA	4	0.0237127	YY1/MDM4/FOSL2/STAT6
PFC	2	hsa-miR-543	MIMAT0004954	miRNA	3	0.0328994	YY1/MDM4/SIRT1
PFC	2	hsa-miR-29b-3p	MIMAT0000100	miRNA	8	0.0312775	YY1/SLC16A1/CBX6/BCL2/IFNG/IMPDH1/SNAI3/SFPQ
PFC	2	hsa-miR-148a-3p	MIMAT0000243	miRNA	6	0.0371314	IRS1/BCL2/WNT1/WAPL/CCKBR/MAFB
PFC	2	hsa-miR-152-3p	MIMAT0000438	miRNA	5	0.0341655	IRS1/WNT1/CCKBR/MAFB/ADAM17
PFC	2	hsa-miR-511-3p	MIMAT0026606	miRNA	2	0.0428288	IRS1/ADH1B
PFC	2	hsa-miR-4789-3p	MIMAT0019960	miRNA	2	0.0339177	IRS1/EGR3
PFC	2	hsa-miR-1915-3p	MIMAT0007892	miRNA	2	0.00543812	SSTR3/BCL2
PFC	2	hsa-miR-22-3p	MIMAT0000077	miRNA	5	0.0253778	PPARA/WNT1/NET1/ADRA1B/SIRT1
PFC	2	hsa-miR-181c-5p	MIMAT0000258	miRNA	5	0.0200901	BCL2/PRKCD/SLC25A25/SIRT1/CARM1
PFC	2	hsa-miR-135a-5p	MIMAT0000428	miRNA	3	0.0262266	BCL2/HTR1A/STAT6
PFC	2	hsa-miR-140-3p	MIMAT0004597	miRNA	2	0.0258468	SIRT1/CD38
PFC	6	hsa-miR-342-3p	MIMAT0000753	miRNA	4	0.00332474	TCF7L2/EP300/SREBF2/CASP3
PFC	6	hsa-miR-191-5p	MIMAT0000440	miRNA	3	0.00664892	TCF7L2/EP300/RCC2
PFC	6	hsa-miR-18a-5p	MIMAT0000072	miRNA	8	7.49919e-05	TCF7L2/RNF138/EP300/SMARCC2/FBXL3/SMAD2/MAD1L1/HSF2
PFC	6	hsa-miR-30e-5p	MIMAT0000692	miRNA	7	0.00103327	TCF7L2/MTF2/RNF138/EP300/CASP3/PCNT/PRF1
PFC	6	hsa-miR-132-3p	MIMAT0000426	miRNA	5	0.00703644	TCF7L2/AGO2/PFAS/DNMT3A/MAPK3
PFC	6	hsa-miR-503-5p	MIMAT0002874	miRNA	4	0.0437483	TCF7L2/ZNRF2/IGF1R/FOXK1
PFC	6	hsa-miR-613	MIMAT0003281	miRNA	3	0.0167542	TCF7L2/RNF138/EP300
PFC	6	hsa-miR-1271-5p	MIMAT0005796	miRNA	2	0.0380404	TCF7L2/SIN3B
PFC	6	hsa-miR-24-3p	MIMAT0000080	miRNA	6	0.0202949	DVL3/MTF2/ARHGAP39/RHOT2/PAK4/MEN1
PFC	6	hsa-miR-29c-3p	MIMAT0000681	miRNA	7	0.00468086	DVL3/RNF138/EP300/RCC2/CASP3/DNMT3A/LOX
PFC	6	hsa-miR-186-5p	MIMAT0000456	miRNA	9	0.00600314	AGO2/CNOT6L/ZNF385A/EP300/GATAD2B/SMARCC2/FOXK1/FBXL3/UPF1
PFC	6	hsa-miR-376a-3p	MIMAT0000729	miRNA	2	0.0485228	AGO2/IGF1R
PFC	6	hsa-miR-99a-5p	MIMAT0000097	miRNA	2	0.0183467	AGO2/IGF1R
PFC	6	hsa-miR-184	MIMAT0000454	miRNA	2	0.0183467	AGO2/NCOR2
PFC	6	hsa-miR-486-5p	MIMAT0002177	miRNA	3	0.00111825	ZNRF2/IGF1R/SMAD2
PFC	6	hsa-miR-30c-5p	MIMAT0000244	miRNA	6	0.0198389	MTF2/RNF138/EP300/CASP3/NCOR2/MTA1
PFC	6	hsa-miR-18b-5p	MIMAT0001412	miRNA	3	0.027327	RNF138/FBXL3/SMAD2
PFC	6	hsa-miR-493-5p	MIMAT0002813	miRNA	2	0.00325086	PCGF2/FBXL3
PFC	6	hsa-miR-185-5p	MIMAT0000455	miRNA	5	0.0144019	CNOT6L/ZNF385A/IGF1R/SREBF2/ACTN4
PFC	6	hsa-miR-4306	MIMAT0016858	miRNA	3	0.00253005	CNOT6L/ZNF385A/SMARCC2
PFC	6	hsa-miR-194-5p	MIMAT0000460	miRNA	3	0.0227567	EP300/IGF1R/DNMT3A
PFC	6	hsa-miR-574-3p	MIMAT0003239	miRNA	2	0.00176684	EP300/RXRA
PFC	6	hsa-miR-7-5p	MIMAT0000252	miRNA	7	0.0144364	ZYX/IGF1R/GATAD2B/RCC2/HECTD3/MRPL10/BCCIP
PFC	6	hsa-miR-375	MIMAT0000728	miRNA	4	0.0373314	IGF1R/LMAN2/CASP3/JAK2
PFC	6	hsa-miR-145-5p	MIMAT0000437	miRNA	5	0.0461489	IGF1R/SMAD2/PAK4/TIRAP/BIRC2
PFC	6	hsa-miR-1275	MIMAT0005929	miRNA	2	0.0101192	IGF1R/MAPK3
PFC	6	hsa-miR-885-5p	MIMAT0004947	miRNA	2	0.00118643	IGF1R/CASP3
PFC	8	hsa-miR-424-5p	MIMAT0001341	miRNA	6	0.0495821	ITGA2/CCNE2/PAK2/PTPRD/CDK6/SMURF1
PFC	8	hsa-miR-203a-3p	MIMAT0000264	miRNA	5	0.0174711	NFYA/KCNJ2/DLC1/CDK6/ALOX15
PFC	8	hsa-miR-22-3p	MIMAT0000077	miRNA	3	0.0398365	NFYA/SP1/CDK6
PFC	8	hsa-miR-124-3p	MIMAT0000422	miRNA	10	0.0235446	SP1/CDK6/DHCR24/VAMP3/CERS2/COL12A1/LDLRAP1/GSN/GRIA1/IQGAP1
PFC	8	hsa-miR-23a-3p	MIMAT0000078	miRNA	4	0.0201669	SP1/ERBIN/CDH1/LPAR1
PFC	8	hsa-miR-33a-5p	MIMAT0000091	miRNA	3	0.0422214	SP1/ERBIN/PTHLH
PFC	8	hsa-miR-155-5p	MIMAT0000646	miRNA	8	0.0182965	SP1/PAK2/CBFB/VAMP3/MEIS1/MYLK/DET1/DOCK1
PFC	8	hsa-miR-499a-5p	MIMAT0002870	miRNA	2	0.0289939	SP1/FOXO4
PFC	8	hsa-miR-200c-3p	MIMAT0000617	miRNA	8	0.000150257	SP1/CCNE2/PAK2/DLC1/PTPRD/CDK6/ERBIN/LPAR1
PFC	8	hsa-miR-145-5p	MIMAT0000437	miRNA	5	0.0204343	SP1/KLF5/CBFB/CDK6/MYO6
PFC	8	hsa-miR-200b-3p	MIMAT0000318	miRNA	7	0.000152826	SP1/CCNE2/PAK2/DLC1/PTPRD/CDK6/ERBIN
PFC	8	hsa-miR-141-3p	MIMAT0000432	miRNA	4	0.0164462	KLF5/DLC1/PTPRD/ERBIN
PFC	8	hsa-miR-9-5p	MIMAT0000441	miRNA	6	0.00318911	KLF5/KCNJ2/CERS2/CDH1/COL12A1/LDLRAP1
PFC	8	hsa-miR-193a-3p	MIMAT0000459	miRNA	2	0.0491251	PTK2/CDK6
PFC	8	hsa-miR-196b-5p	MIMAT0001080	miRNA	3	0.0310135	KCNJ2/MEIS1/CD8A
PFC	8	hsa-miR-206	MIMAT0000462	miRNA	3	0.0191635	KCNJ2/CERS2/SFRP1
PFC	8	hsa-miR-34a-5p	MIMAT0000255	miRNA	7	0.00260712	CCNE2/CDK6/HDAC1/NFE2L2/ACSL1/GRM7/CDKN2C
PFC	8	hsa-miR-449b-5p	MIMAT0003327	miRNA	3	0.0115475	CCNE2/CDK6/HDAC1
PFC	8	hsa-miR-449a	MIMAT0001541	miRNA	4	0.00259976	CCNE2/CDK6/HDAC1/GRM7
PFC	8	hsa-miR-34c-5p	MIMAT0000686	miRNA	3	0.0386707	CCNE2/CDK6/CDH1
PFC	8	hsa-miR-200a-3p	MIMAT0000682	miRNA	5	0.00207489	CCNE2/DLC1/PTPRD/CDK6/ERBIN
PFC	8	hsa-miR-34b-5p	MIMAT0000685	miRNA	2	0.0147342	CCNE2/CDK6
PFC	8	hsa-miR-495-3p	MIMAT0002817	miRNA	3	0.0331109	DLC1/MEIS1/CDH1
PFC	8	hsa-miR-191-5p	MIMAT0000440	miRNA	2	0.0385486	CDK6/DHCR24
PFC	8	hsa-miR-494-3p	MIMAT0002816	miRNA	3	0.0352808	CDK6/PTTG1/MAL
PFC	8	hsa-miR-129-2-3p	MIMAT0004605	miRNA	2	0.000769241	CDK6/CCP110
PFC	8	hsa-miR-205-5p	MIMAT0000266	miRNA	3	0.0363928	DHCR24/CDH1/ACSL1
PFC	8	hsa-miR-204-5p	MIMAT0000265	miRNA	4	0.00863341	AP1S3/MEIS1/CDH1/MYO6
